# Supplementary material for: Monitoring coastal pollution associated with the largest oil refinery complex of Venezuela
Source: PeerJ. 2016 Jun 23;4:e2171. doi: 10.7717/peerj.2171 (PMC4928465; doi:10.7717/peerj.2171)
Supplement: Supplemental Information 1 — Enrichment factors (EF) of several heavy metals recorded in ten sediments along the western cpst of Paraguaná. EFs were calculated using Fe as metal of reference. [file peerj-04-2171-s001.xlsx]

## Sheet: Hoja1
years	Locality	EF Cd/Fe		EF Cr/Fe		EF Pb/Fe		EF V/Fe		EF Ni/Fe
		Avg	SD	Avg	SD	Avg	SD	Avg	SD	Avg	SD
2008	1	120.599	5.81148	0.872156	0.0976679	0.975655	0.14192	0.71402	0.55993	1.08742	0.0545322
	2	77.6664	67.3489	0.936782	0.0686217	0.99497	0.180848	0.937842	0.766969	1.04515	0.134916
	3	117.837	22.3245	0.669807	0.0830899	0.541304	0.937566	0.428352	0.741927	0.439107	0.0449714
	4	111.871	30.9151	0.669892	0.581915	1.03994	0.915477	1.40203	0.906009	0.368591	0.0860414
	5	94.287	82.698	1.53811	1.24427	1.59287	1.43219	0.459961	0.796676	0.563744	0.163971
	6	84.5805	73.3372	1.04767	0.0920947	1.85752	1.737	1.68884	1.1384	0.561304	0.0763349
	7	93.7642	81.2187	1.34383	0.331861	0.683534	1.18392	1.59294	1.37354	0.539296	0.467342
	8	79.1554	69.0689	1.30003	0.184094	1.30892	1.20864	1.5367	0.675884	0.731702	0.0668124
	9	82.3744	72.7486	1.17472	0.152894	1.00858	0.909253	1.56384	0.266336	0.854761	0.0947693
	10	101.183	15.9075	1.2084	0.0230771	0.872415	0.226444	1.42109	0.276389	0.998087	0.0193241
	11	114.755	23.9835	1.27603	0.0746308	1.66158	0.933436	2.1947	0.804075	1.10953	0.413307
	12	102.202	14.5693	1.2642	0.0646168	0.995303	0.132248	1.74157	0.0579046	1.12849	0.14094
	13	103.756	14.5174	1.26809	0.0474501	1.05942	0.0900941	1.60501	0.345338	1.0451	0.0478813
	14	97.4744	18.3882	1.22196	0.0703998	1.93342	0.081629	1.38437	0.443953	0.944465	0.0190338
	15	102.859	21.9725	1.07581	0.179257	2.25181	1.47966	1.09631	0.0450458	1.3547	0.747732
	16	103.285	19.0004	1.18849	0.0140598	1.27279	0.166799	1.45392	0.386498	0.953027	0.0397239
	17	106.443	16.0234	1.1106	0.0786852	1.12032	0.10712	1.28035	0.316588	0.886376	0.0646946
	18	106.745	14.1984	1.31271	0.0824125	1.5214	0.638147	1.62656	0.0468861	1.09563	0.0342016
	19	117.187	26.8734	0.987547	0.539639	2.13372	0.812532	1.39615	0.613699	0.91944	0.434366
	20	115.152	21.5269	0.750069	0.552917	1.74689	0.269198	0.982633	0.418953	0.750183	0.523893
2009	1	123.476	14.2976	0.89767	0.0849227	1.62614	0.311322	0.746628	0.199739	0.789544	0.235109
	2	133.915	3.7275	0.654231	0.0104615	2.27104	0.891381	1.03911	0.176131	0.835504	0.43149
	3	149.123	25.068	0.636338	0.0822827	3.47093	1.54034	1.32331	0.0979444	0.604983	0.260601
	4	135.347	20.8804	0.97427	0.0228004	2.51757	0.948604	1.27486	0.207908	0.445388	0.353183
	5	144.914	14.6254	1.10392	0.20637	2.58651	0.946314	0.974582	0.310065	0.759446	0.245635
	6	108.769	73.0852	1.00783	0.0823085	3.90228	0.887989	1.08537	0.175668	0.596282	0.522832
	7	156.407	9.70504	0.94514	0.308143	7.46639	5.59273	1.29977	0.167795	0.673485	0.276242
	8	5235.84	8802.89	0.887102	0.861323	2.19015	1.90551	6.71388	9.46512	14.7574	24.3538
	9	150.979	2.39615	1.1899	0.0730021	2.53579	0.457508	1.67613	0.11499	1.02625	0.176811
	10	131.28	12.6966	1.07856	0.196489	2.80939	2.34594	1.08936	0.312823	0.925993	0.281218
	11	118.081	13.5555	1.00273	0.136045	2.42797	1.98373	1.64373	0.0895588	0.988933	0.224087
	12	132.599	27.0308	0.929771	0.0905552	2.84379	1.25688	1.48182	0.549757	0.791871	0.528766
	13	139.283	26.5235	0.923887	0.0493476	4.52237	1.90735	1.07114	0.24987	0.591009	0.404987
	14	119.326	17.595	0.999858	0.1282	3.88725	1.81682	1.09561	0.352639	0.852576	0.115932
	15	121.214	18.3913	0.897432	0.0439562	5.22218	6.62504	1.02867	0.135497	0.930724	0.0790384
	16	117.145	14.0894	0.770853	0.137277	1.71665	0.426956	0.861447	0.213298	1.14277	0.590301
	17	129.414	8.017	1.05436	0.324672	2.9163	0.548778	1.08968	0.123029	0.92187	0.207346
	18	125.134	20.7153	0.982938	0.240971	7.23133	8.35586	0.998311	0.137687	0.949027	0.131924
	19	124.927	16.8079	0.964713	0.46334	4.39431	4.31	1.35945	0.211373	1.11497	0.0875049
	20	147.904	20.3338	0.899902	0.881191	2.6228	0.709139	0.799199	0.149918	0.689302	0.173784
2010	1	105.862	10.669	0.678253	0.129515	0.88955	0.823176	1.14989	0.279635	0.419649	0.433995
	2	97.0454	5.86986	0.653459	0.0762877	0.850508	0.787233	0.991011	0.171611	0.749507	0.500465
	3	77.3958	67.4887	0.864004	0.269075	1.94784	0.525477	1.43659	0.0680558	1.00661	1.50002
	4	101.416	14.4421	1.58837	0.953447	1.11828	1.02384	1.52572	0.262929	0.499435	0.399625
	5	98.4628	24.9828	0.810506	0.231673	1.94785	0.789945	1.54237	0.691865	0.217223	0.194235
	6	98.8441	17.0675	1.07301	0.151282	2.54799	0.26692	1.37828	0.258387	0.199957	0.180363
	7	68.1539	60.5529	1.3941	1.44124	5.70589	5.14573	1.42272	0.0385586	0.297748	0.292103
	8	22.459	38.9001	1.16328	0.135497	1.59983	1.76654	1.78336	0.237514	0.895128	1.0905
	9	81.9262	27.8843	1.33862	0.270818	3.79453	3.30707	1.56956	0.412526	0.454209	0.424983
	10	93.3682	29.9124	1.18708	0.0788977	0.926352	0.827716	1.42838	0.470248	0.713228	0.173113
	11	85.2304	23.3464	0.970046	0.180477	1.28629	1.31722	1.87687	0.54628	0.672883	0.220925
	12	91.6973	21.9669	1.07298	0.150221	1.11607	0.335309	2.05294	0.465393	0.914069	0.510613
	13	82.3649	12.5304	1.12179	0.144512	1.19037	0.223767	1.83955	0.279541	1.13907	0.123609
	14	53.5948	48.4025	1.35276	0.707105	2.47212	0.632016	1.52307	0.149941	0.89869	0.326916
	15	23.3774	40.4908	1.08617	0.0872061	1.99258	1.80643	1.88834	0.706962	0.403525	0.373245
	16	80.9331	12.0215	1.09598	0.119608	2.19973	1.00878	1.08554	0.104338	0.847021	0.0726926
	17	83.8564	12.9835	0.960356	0.0259419	1.61186	0.169057	1.14852	0.124579	0.897168	0.0453979
	18	86.0528	16.8332	1.06646	0.154929	1.93015	0.43126	1.31536	0.0423118	0.961261	0.120556
	19	95.6548	9.37475	0.920073	0.527955	2.42153	0.493804	1.20632	0.490632	0.954615	0.252585
	20	100.851	17.7119	0.378589	0.0710859	2.01469	0.41944	0.778594	0.155634	0.421481	0.0633988
2011	1	123.583	23.1918	0.707991	0.141487	1.37633	1.26251	1.19521	0.194957	0.56735	0.251939
	2	100.663	11.2722	0.784656	0.132407	0.664713	0.591406	1.0244	0.173171	1.27256	0.548009
	3	128.733	22.0732	0.639892	0.112876	0.768399	1.1279	1.37863	0.23771	0.652119	0.272
	4	117.195	19.5763	0.724448	0.124863	1.65595	1.87347	1.44854	0.166452	0.596522	0.164043
	5	115.661	20.825	0.98079	0.0941928	3.17759	3.73041	1.67846	0.452064	0.759049	0.137098
	6	118.301	26.3617	1.0256	0.154989	2.98584	2.12465	1.39896	0.124435	0.81151	0.221304
	7	104.423	29.0167	0.995135	0.380193	4.84796	3.93508	1.45651	0.248171	0.901717	0.522538
	8	81.9479	48.2307	0.993048	0.556713	3.11857	2.62603	1.42364	0.858806	0.913912	0.571282
	9	102.963	21.4935	1.06588	0.199705	2.18193	1.98769	1.488	0.699343	1.3461	0.444169
	10	105.561	29.6006	0.98576	0.210488	1.69571	1.71313	1.51688	0.40828	0.942316	0.339275
	11	98.5622	12.4653	1.05255	0.0704079	0.702344	0.68529	1.20569	0.576513	1.32505	0.37853
	12	111.612	23.6091	0.901276	0.0825776	1.24024	1.16457	1.50924	0.738918	1.04815	0.198498
	13	102.711	24.5421	0.992716	0.166589	2.7542	4.08051	2.24759	0.894955	1.34971	0.477721
	14	95.9134	15.4998	1.00442	0.208388	0.669141	0.661269	1.25697	0.295549	1.24765	0.34545
	15	106.251	42.3473	1.01926	0.186049	1.62232	0.984006	0.93156	0.292298	1.14225	0.285947
	16	90.8503	11.4565	0.882443	0.206151	0.906248	1.18259	0.948559	0.226635	0.964756	0.173886
	17	274.112	413.701	2.11587	2.59254	4.29248	7.17097	2.15271	2.39521	3.72458	5.79834
	18	92.083	11.0801	0.959745	0.104198	1.75065	1.69829	1.25249	0.173154	1.20207	0.298963
	19	98.529	16.6496	1.1813	0.223622	1.85063	1.93728	1.3586	0.352589	1.27111	0.30501
	20	114.74	44.9584	0.592901	0.320827	1.84589	1.1597	0.961613	0.320762	0.705435	0.290568
2012	1	102.793	28.1778	0.574233	0.0822377	0.552419	0.956818	1.10017	0.128238	0.398231	0.15088
	2	91.9289	11.806	0.795352	0.0735699	0.640328	0.573361	1.03622	0.151903	1.05383	0.128226
	3	102.907	18.9706	0.719652	0.125054	0.685758	1.18777	1.17144	0.156962	0.477892	0.172972
	4	106.797	29.0298	0.64949	0.117152	0.948251	1.64242	1.2008	0.134933	0.384752	0.0740665
	5	75.2339	78.1674	0.971698	0.0633932	2.23585	1.95571	1.73101	0.0454536	0.366171	0.325051
	6	110.763	23.7945	0.962102	0.0785589	0.961793	1.66587	1.24395	0.191143	0.823271	0.356598
	7	89.1491	77.2771	0.785786	0.217906	0	0	0.894396	0.0869504	1.74294	0.864331
	8	85.2225	73.8323	0.871639	0.06171	1.09401	1.89489	0.991556	0.14412	0.758229	0.0439041
	9	100.48	55.7867	1.20792	0.140586	1.00045	1.73282	1.32221	0.0968906	0.796954	0.138835
	10	77.9575	67.5747	1.02472	0.0796602	2.00554	0.968997	0.849404	0.277522	1.10709	0.15786
	11	97.0474	44.4638	1.00572	0.199155	0.373789	0.647421	1.13141	0.211179	1.48381	0.79888
	12	123.58	16.3755	0.795007	0.122035	1.9536	2.26073	0.698568	0.660008	0.696051	0.602798
	13	103.687	8.68959	1.05452	0.179916	1.03183	1.18819	1.41521	1.42666	1.2095	0.158182
	14	94.5615	4.45909	1.05346	0.110014	0.523132	0.90609	1.14129	0.129679	1.06964	0.140652
	15	106.204	14.558	0.633288	0.487995	2.82388	0.588714	0.782599	0.301231	0.812819	0.0817853
	16	100.944	10.0359	0.915611	0.296913	0.363184	0.629054	0.897971	0.381657	0.945843	0.123255
	17	94.7603	7.80055	0.854019	0.183545	0.699154	0.66402	0.782689	0.104727	0.903542	0.0126684
	18	97.4671	6.98387	0.989629	0.122155	1.22312	1.07199	1.27205	0.323403	0.98495	0.0475774
	19	99.2146	8.28474	1.00235	0.0502094	1.56807	0.180841	1.18938	0.251279	1.18003	0.0952152
	20	146.247	57.2573	0.313532	0.0877419	2.56111	1.31854	0.570215	0.156743	0.448611	0.0498454
2013	1	107.083	6.68181	0.625258	0.0262893	0.466639	0.933278	1.18257	0.0654268	0.119703	0.0981404
	2	100.455	0.995684	0.706565	0.169019	0.853019	0.573919	0.908047	0.226719	0.96263	0.0728944
	3	122.032	15.3223	0.779783	0.157974	1.70273	1.14157	1.20048	0.143721	0.260695	0.267731
	4	119.163	11.8225	0.730407	0.0265811	0.636847	1.27369	1.38602	0.0963324	0.0176855	0.0204215
	5	120.518	20.3555	0.989818	0.112128	0.932807	1.86561	1.88987	0.027933	0.922241	0.344271
	6	81.7294	47.8481	1.06548	0.117719	1.36681	1.57826	1.34815	0.271079	0.625991	0.0854435
	7	195.332	176.827	0.85558	0.0472549	13.8204	16.5764	1.33762	0.350569	0.406059	0.286015
	8	116.809	12.118	0.931222	0.0928542	1.67855	1.93822	1.07856	0.360623	6.41724	6.88113
	9	108.258	2.2716	1.16939	0.105411	1.00228	1.15733	1.59966	0.528496	0.881052	0.0644005
	10	99.7817	5.26489	1.20932	0.0526563	1.35928	1.00361	1.16617	0.196537	0.865168	0.127188
	11	98.2505	2.7207	1.10094	0.142253	1.28994	0.0314554	0.993911	0.283487	0.918158	0.101106
	12	140.294	37.8412	1.50682	0.841409	2.30272	1.7747	1.85454	0.492086	0.849766	0.596276
	13	102.128	9.26197	1.28538	0.0237435	1.22105	0.882659	4.10868	1.26132	1.49556	0.207892
	14	96.4008	5.8928	1.23519	0.0313129	1.11622	0.773725	1.21508	0.0733353	1.06812	0.124321
	15	100.032	6.1617	1.07802	0.0808948	2.97705	0.492288	1.03142	0.190627	0.900399	0.0442884
	16	101.026	5.53284	1.03077	0.195508	0.73129	0.844651	0.93054	0.251846	1.75452	1.01146
	17	94.3404	1.46029	1.1022	0.0661411	0.481951	0.558063	1.15426	0.244149	0.912789	0.067565
	18	97.3602	3.24632	1.05256	0.0791467	0	0	1.20631	0.286479	1.01261	0.120999
	19	100.67	4.21735	1.17871	0.172002	1.89434	0.0520832	1.41435	0.448778	1.16115	0.0665399
	20	128.114	22.453	0.651573	0.518279	2.61144	0.536441	0.612619	0.408784	0.677776	0.325718
2014	1	158.716	34.8491	0.709167	0.150244	0.916772	1.29651	1.41244	0.614971	0.270967	0.0705839
	2	329.184	299.409	2.49979	2.33516	2.25094	1.9154	3.31966	3.20899	2.18334	1.65084
	3	475.053	487.304	2.81551	2.70032	6.6757	6.59605	4.55603	4.91629	0.292297	0.41337
	4	319.483	269.51	2.15026	1.83015	5.59587	5.155	4.20947	4.23987	0.305065	0.431427
	5	428.146	435.073	2.2963	1.95128	9.02564	9.23047	5.57897	5.61153	0.831214	1.17551
	6	241.165	161.007	2.14146	1.60232	0	0	3.4451	3.02173	0.213596	0.30207
	7	299.203	233.765	2.4468	2.14423	4.81987	6.81633	4.51618	4.44284	0.424585	0.600454
	8	137.055	29.7919	1.20933	0.151759	0.77802	1.10029	1.53003	0.475956	1.12241	0.128197
	9	98.3495	19.3741	0.925016	0.282863	0.83654	1.18305	1.24016	0.0161076	0.672119	0.26489
	10	82.8614	38.6976	0.903573	0.399561	0.932799	0.600581	0.872003	0.252186	0.768881	0.34699
	11	139.938	51.5903	1.57331	0.603555	1.21662	0.0373052	1.6365	0.833954	1.15752	0.030079
	12	136.682	15.7211	0.863271	0.0159184	3.58606	1.11239	2.18456	0.629922	0.211179	0.298652
	13	73.786	53.1543	0.77377	0.45037	0.807895	0.740095	2.20049	1.00197	0.967019	0.83891
	14	65.6328	56.0256	0.754475	0.647876	0.712049	0.633689	0.761124	0.593829	0.609119	0.622134
	15	84.6402	30.0325	0.894345	0.307165	2.21789	0.769701	0.887669	0.179087	0.646413	0.399118
	16	83.0183	28.9816	0.864653	0.305276	0.336932	0.476494	0.905013	0.202411	0.906911	0.177966
	17	77.4003	32.8806	0.858952	0.337013	0.284617	0.402509	0.815244	0.232875	0.623109	0.329382
	18	64.0195	64.2127	0.618018	0.587057	1.09455	1.20993	0.761584	0.698948	0.427567	0.431441
	19	265.744	217.506	3.43016	2.92713	2.30778	1.93016	4.30208	3.95912	2.78079	2.33224
	20	2299.84	3079.18	6.44397	8.52855	27.9464	36.5197	15.3303	20.6046	4.37589	5.56347
